# Supplementary material
Source: publisher figshare collection journal article supplement (https://frontiersin.figshare.com/ndownloader/files/13559150)
Supplement: Supplementary file [file 13559150]

*Supplementary Material*

**A Screening of mutants related to the C<sub>4</sub> photosynthetic Kranz structure in foxtail millet**

**Mingzhao Luo, Shuo Zhang, Chanjuan Tang, Guanqing Jia\*, Sha Tang, Hui Zhi, Xianmin Diao \***

**\* Correspondence:**

Guanqing Jia: [jiaguanqing@caas.cn](mailto:jiaguanqing@caas.cn)

Xianmin Diao: [diaoxianmin@caas.cn](mailto:diaoxianmin@caas.cn)

## Supplementary Figure

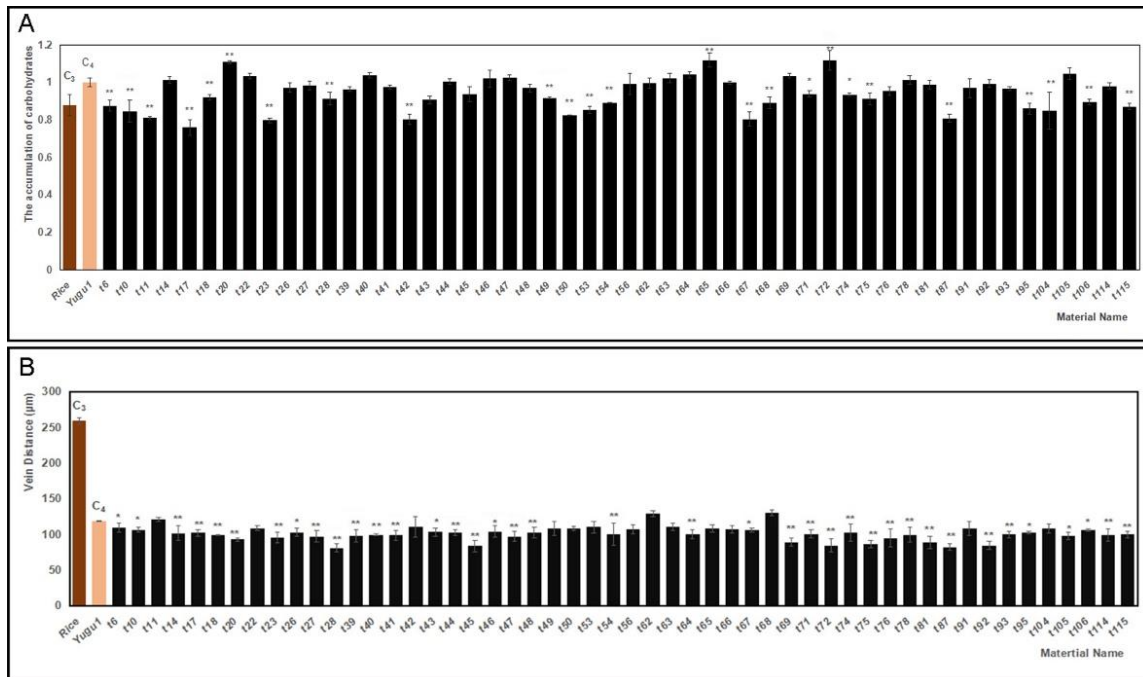

**Supplementary Figure 1.** The accumulation of carbohydrate (A) and vein distance(B) variations of 52 mutant lines identified by Image J. Comparisons between mutants and wild-type (WT) were determined by Student's t-test. '\*' means significance level is below 0.05, and '\*\*' means significance level is below 0.01.

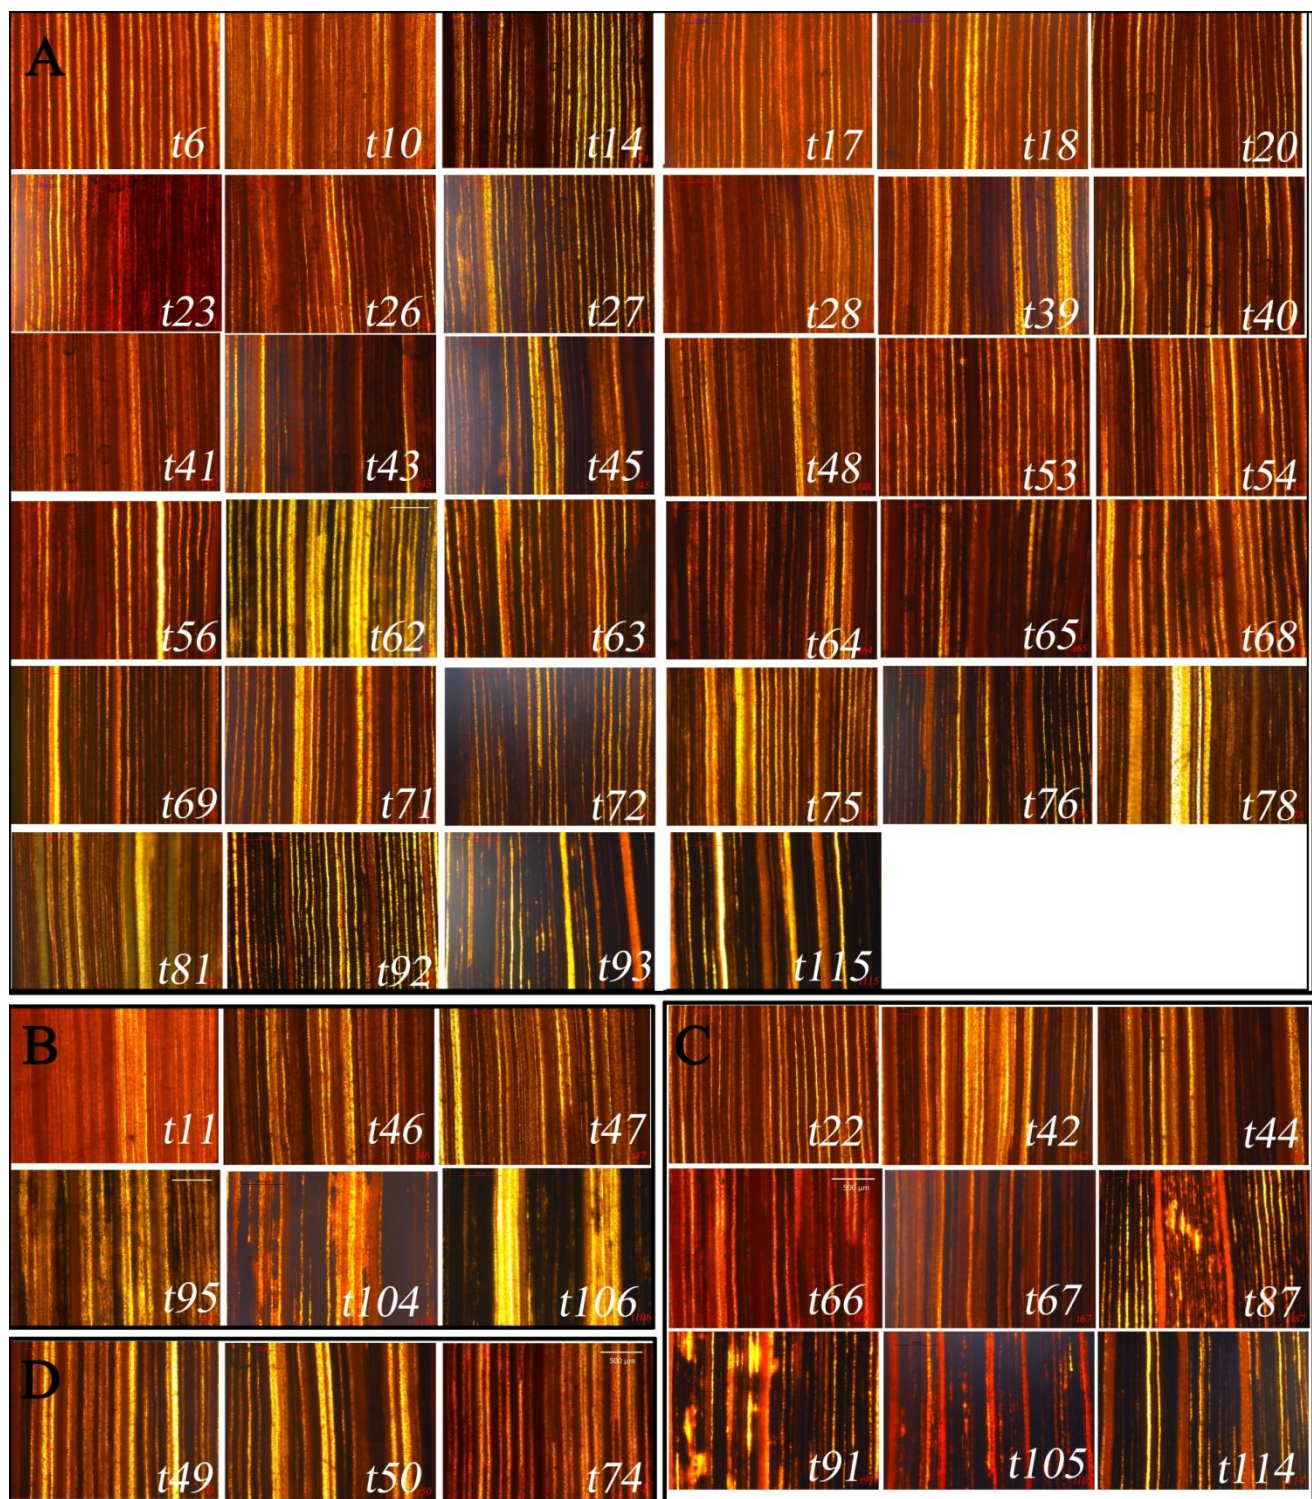

**Supplementary Figure 2.** Four types(A-D) of abnormal leaf veins, based on the change of accumulation of carbohydrates revealed by color and veins variations detected in mutants after iodine staining.



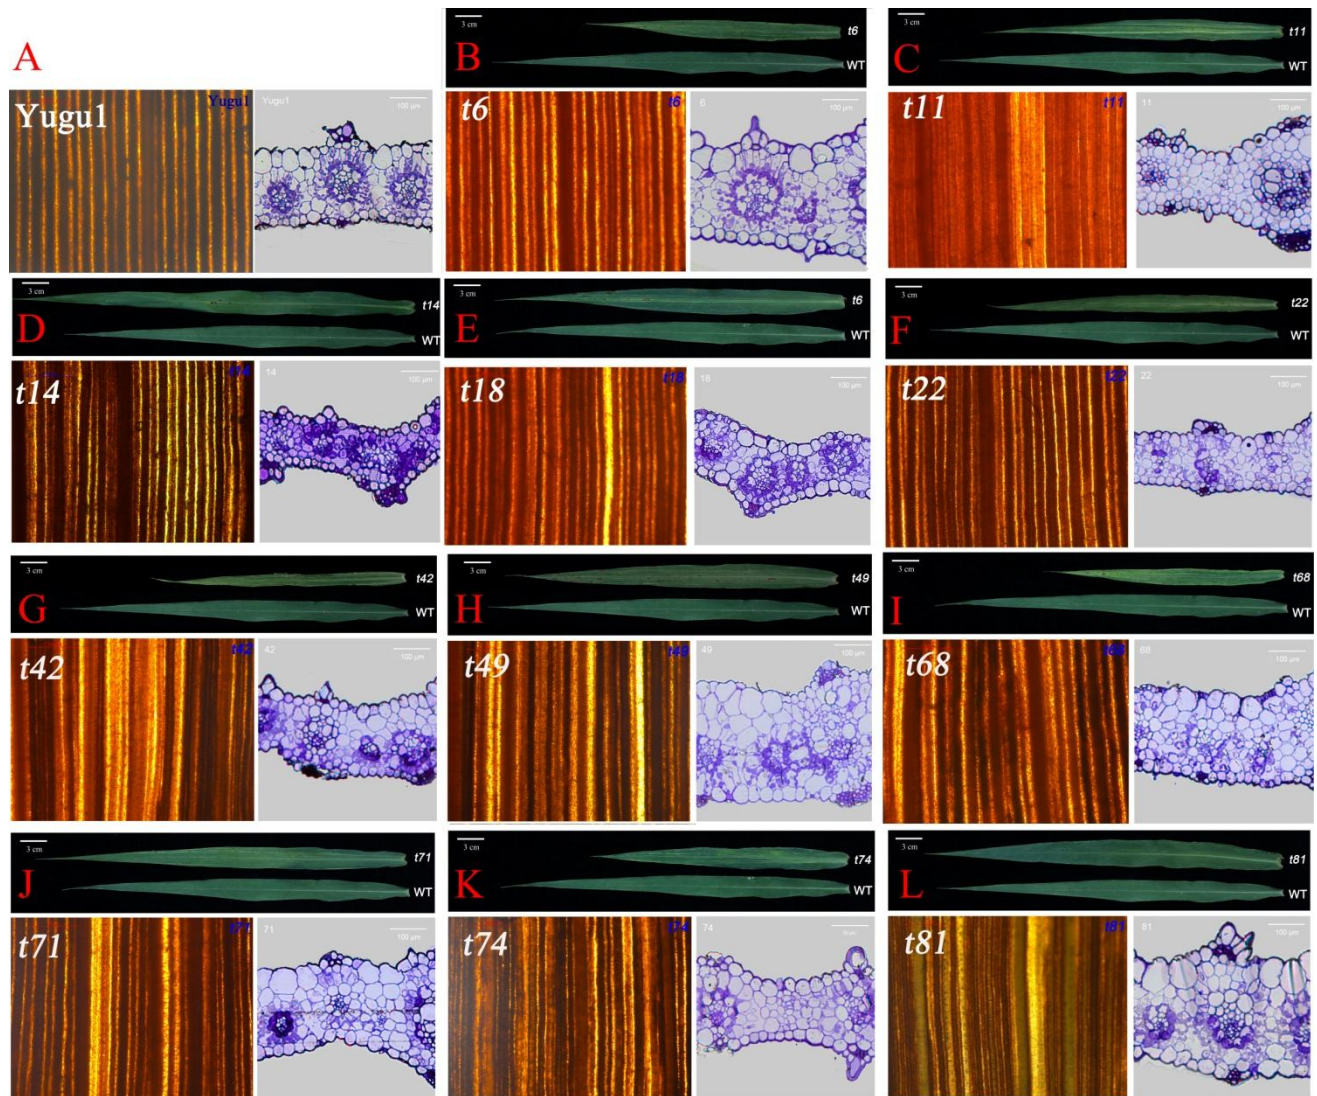

**Supplementary Figure 3.** Abnormally developed Kranz structures (A-L) were observed.
